# Supplementary material for: Room-temperature ionic liquids as media to enhance the electrochemical stability of self-assembled monolayers of alkanethiols on gold electrodes
Source: Royal Society of Chemistry journal article supplement (doi:10.1039/b412412j), 2004-11-30
Supplement: b412412j.doc [file b412412j.doc]

**Room-temperature Ionic Liquids as Medium to Enhance the Electrochemical Stability of Self-assembled Monolayers of Alkanethiol on Gold Electrode**

Jinghong Li*, Yanfei Shen, Yuanjian Zhang and Yang Liu

**ESI**

**Experimental details**

**Reagents**

1-butyl-3-methylimidazolium hexafluorophosphate (BMIMPF6) (97%) was purchased from Acros. It was washed with double distilled water to remove the residual halogen in it, then the water was decanted, and BMIMPF6 was heated at 80 oC for 12 h under vacuum and then kept under vacuum desiccators to protect it from moisture [1]. Octadencanethiol (C18SH), dodencanethiol (C12SH) and octanethiol (C8SH) were purchased from Acros and used as received. Other reagents were of analytical grade and used as received. All the water used in experiments was the double distilled water obtained from a Millipore-Q system (18.2 M).

**Preparation of self-assembled monolayers of C18SH on the gold electrode**

A gold electrode was mechanically polished with 1, 0.3 and 0.05 m -Al2O3 and washed ultrasonically with double distilled water, subsequently electrochemically cleaned in 1 M H2SO4 by potential scanning between – 0.2 and 1.55 V until a reproducible cyclic voltammogram was obtained. The monolayers were formed by placing the clean bare gold electrode in a freshly made 1 mM C18SH solution in ethanol for 48 h at room temperature. After chemsorption, the gold electrode modified with C18SH was rinsed with dry ethanol and double distilled water, subsequently blown dry with high-purity nitrogen before further characterization.

**Electrochemical measurement**

Electrochemical measurements were carried out in a conventional three-electrode electrochemical cell. The cell was sealed to minimize the influence of O2 and H2O during experiments. The working electrode was a bare gold electrode (0.00785 cm2) or a SAMs modified gold electrode, and the auxiliary electrode was a platinum wire. For measurements in aqueous media, an Ag/AgCl (saturated KCl) was used as the reference electrode; and for measurements in RTILs or TOAB/CH2Cl2, an Ag wire (inside a frit containing BMIMPF6) was used as a quasi-reference electrode. The potential of the quasi-reference electrode was calibrated to be 0.06 V more positive than that of Ag/AgCl (saturated KCl) electrode. All potentials in the text were given with respect to Ag/AgCl (saturated KCl). All stock solutions were degassed with N2 for 30 min prior to electrochemical experiments.

In the potential-dependent and time-dependent experiments, the SAMs modified electrodes were conditioned in BMIMPF6 or TOAB/CH2Cl2 at various potentials for various length of time, rinsed with ethanol and water in turn for 10 min respectively, subsequently blown dry with high-purity nitrogen, and then analyzed for remaining surface coverage [2]. The surface coverage  was obtained from cyclic voltammetric blocking experiments using ferricyanide (K3Fe(CN)6) as a redox probe, which could provide insights into the electron-transfer barrier properties of the SAMs on gold electrodes [3]. Specifically, the fraction of pinhole area (1- ) of the modified electrode was obtained through the ratio of the peak area of K3Fe(CN)6 at the modified gold electrode to that at bare gold electrode, and the value of surface coverage  was further calculated from that of the fraction of pinhole area (1- ). In the time-dependent experiments, the surface coverage of SAMs in BMIMPF6 conditioned at some potentials no longer changed after 30 min (Figure S1), so the time scale of the potential-dependent experiments was chosen as 30 min (Figure 2).

Cyclic voltammetry was performed with CHI 832 Electrochemical Instrument (CHI Inc., USA)

Ac-Impedance measurements were performed with a Solartron 1470 Battery Test Unit and a Solartron 1255 B Frequency Response Analyzer (Solartron Inc., England). A sinusoidal potential modulation of ± 10 mV amplitude was superimposed on a dc potential. Applied frequency was from 105 Hz to 10 Hz. Fifteen points were acquired per decade increment in frequency. The time scale of each experiment was about 30 min. Impedance data were fitted to an appropriate electrical equivalent circuit using the Z plot / Z view software (Scribner Associates Inc., England). The symbols on each impedance plot represented the experimental data, and the solid lines were the fitting results. In RTILs and TOAB/CH2Cl2, the effect of the applied dc potential (Edc) on the SAMs permeability was investigated from 0 V to a certain negative potential (RTILs, -1.3 V; TOAB/CH2Cl2, -0.7 V) in 0.1 V step. The Nyquist plots remained straight lines and almost overlapped until a vertical potential (Vc) was accessed. In this potential range, SAMs behaved as ions insulators and the Nyquist plots should be fitted to the equivalent circuit **I** in Figure S2. When the potential was cathodic than Vc, a significant curvature was observed and SAMs became permeable to ions and solvent molecules in solutions. The corresponding Nyquist plots should be fitted to the equivalent circuit **II** in Figure S2.

**Fig. S1** Surface coverage of C18SH/Au SAMs after electrochemical conditioning at 1.06 V (1), 1.56 V (2) and -1.94 V (3) for various time in BMIMPF6.

**Fig. S2** Equivalent circuit (**I**) of a defect-free C18SH/Au SAM and (**II**) of a C18SH/Au SAM with defects in the absence of the redox species. Rs is the solution resistance, CPE (constant phase element) represents the electrical double-layer capacitance, and Rct is the resistance of SAMs and accounts for the permeability of ions within the SAMs.

**Fig. S3** Cyclic voltammograms of C8SH/Au (1), C12SH/Au (2) and C18SH/Au (3) SAMs in positive (A) and negative (B) potential regions in BMIMPF6. Scan rate, 100 mVs-1.

**Fig. S2** Equivalent circuit (**I**) of a defect-free C18SH/Au SAM and (**II**) of a C18SH/Au SAM with defects in the absence of the redox species. Rs is the solution resistance, CPE (constant phase element) represents the electrical double-layer capacitance, and Rct is the resistance of SAMs and accounts for the permeability of ions within the SAMs.

**Table S1** The fitting results of SAMs in TOAB/CH2Cl2 and BMIMPF6 as a function of applied dc potentials.

|  | Potential/V | Rs/ | Cdl/10-8 F | Rct/106  |
| --- | --- | --- | --- | --- |
| CH2Cl2 | 0 to -0.5 V | 4781 | 1.37 |  |
| -0.6 V | 3339 | 3.06 | 2.39 |
| -0.7 V | 3470 | 3.75 | 0.746 |
| BMIMPF6 | 0 to -0.8 V | 3874 | 0.819 |  |
| -1.0 V | 3299 | 1.13 | 1.37 |
| -1.3 V | 3288 | 2.26 | 0.661 |

A sinusoidal potential modulation of ± 10 mV amplitude was superimposed on a dc potential. Applied frequency was from 105 Hz to 10 Hz. Rs, the solution resistance; Cdl, the monolayer capacitance obtained from the CPE values; Rct, the resistance of the SAMs.

**References**

1. Bonhote, P.; Dias, A.-P.; Papageorgiou, N.; Kalyanasundaram, K.; Gratzel, M. *Inorg. Chem*. **1996**, 35, 1168.
2. Everett, W. R.; Welch, T. L.; Reed, L.; Fritsch-Faules, I. *Anal. Chem*. **1995**, *67*, 292.
3. Jia, J.; Wang, B.; Wu, A.; Cheng, G.; Li, Z.; Dong, S. *Anal. Chem*. **2002**, *74*, 2217.
